# Supplementary material for: Swedish Trotting Horse Trainers’ Perceptions of Animal Welfare Inspections from Public and Private Actors
Source: MDPI journal article supplement (doi:10.3390/ani12111441), 2022-06-03
Supplement: s1 [file s1]

**Table S1.** Supplementary material on how responses to some of the categorical questions in the questionnaire were grouped into new groups before the statistical analysis.

| Question        | Original Response Categories       | New Categories for Statistical Analysis |
|-----------------|------------------------------------|-----------------------------------------|
| Geographical    | Stockholm County                   | SE1                                     |
|                 | Uppsala County                     |                                         |
|                 | Södermaland County                 |                                         |
|                 | Östergötland County                |                                         |
|                 | Örebro County                      |                                         |
|                 | Västmanland County                 |                                         |
|                 | Jönköping County                   | SE2                                     |
|                 | Kronoberg County                   |                                         |
|                 | Kalmar County                      |                                         |
|                 | Gotland County                     |                                         |
|                 | Blekinge County                    |                                         |
|                 | Skåne County                       |                                         |
|                 | Halland County                     | SE3                                     |
|                 | Västra Götaland County             |                                         |
|                 | Värmland County                    |                                         |
|                 | Dalarna County                     |                                         |
|                 | Gävleborg County                   |                                         |
|                 | Västernorrland County              |                                         |
|                 | Jämtland County                    |                                         |
|                 | Västerbotten County                |                                         |
|                 | Norrbotten County                  |                                         |
| Age             | < 20 years                         | <= 30 years                             |
|                 | 20-30 years                        |                                         |
|                 | 31-40 years                        | -                                       |
|                 | 41-50 years                        | -                                       |
|                 | 51-60 years                        | -                                       |
|                 | 61-70 years                        | -                                       |
|                 | > 70 years                         | -                                       |
| Gender          | Woman                              | -                                       |
|                 | Man                                | -                                       |
|                 | Other/do not want to respond       | <i>Removed, considered missing</i>      |
| Education       | Elementary/comprehensive school    | -                                       |
|                 | High school                        | -                                       |
|                 | Vocational university              | -                                       |
|                 | College/university 1-3 years       | College/university                      |
|                 | College/university 4-5 years       |                                         |
|                 | College/university doctoral degree |                                         |
| Physical health | Very good                          | Good                                    |
|                 | Good                               |                                         |
|                 | Not very good                      | Bad                                     |
|                 | Bad                                |                                         |
| Mental health   | Very good                          | Good                                    |
|                 | Good                               |                                         |
|                 | Not very good                      | Bad                                     |
|                 | Good                               |                                         |
| Work experience | 1-4 years                          | 1-9 years                               |
|                 | 5-9 years                          |                                         |

|                                                |                            |                                                                                                            |
|------------------------------------------------|----------------------------|------------------------------------------------------------------------------------------------------------|
|                                                | 10-19 years                | -                                                                                                          |
|                                                | 20-29 years                | -                                                                                                          |
|                                                | 30-39 years                | -                                                                                                          |
|                                                | 40-49 years                | > 40 years                                                                                                 |
|                                                | > 50 years                 |                                                                                                            |
| Age/sex of inspector<br>(multiple choice)      | One younger woman          | <i>If only any of these alternatives were chosen:</i><br>Only younger women/woman                          |
|                                                | Two younger women          |                                                                                                            |
|                                                | One younger man            | <i>Any combination of these choices (also including younger women/women):</i><br>Remaining ages and gender |
|                                                | Two younger men            |                                                                                                            |
|                                                | One man in my age          |                                                                                                            |
|                                                | Two men in my age          |                                                                                                            |
|                                                | One woman in my age        |                                                                                                            |
|                                                | Two women in my age        |                                                                                                            |
|                                                | One older man              |                                                                                                            |
|                                                | Two older men              |                                                                                                            |
|                                                | One older woman            |                                                                                                            |
|                                                | Two older women            |                                                                                                            |
|                                                | Don't remember/cannot tell | <i>Removed, considered missing</i>                                                                         |
| Was the inspection<br>announced<br>beforehand? | Yes, well in advance       | Yes                                                                                                        |
|                                                | Yes, some days before      |                                                                                                            |
|                                                | Only the same day          | No, it was announced the same day or not at all                                                            |
|                                                | No                         |                                                                                                            |
|                                                | I don't remember           | <i>Removed, considered missing</i>                                                                         |
